# Supplementary material for: New insights into experimental visceral leishmaniasis: Real-time in vivo imaging of Leishmania donovani virulence
Source: PubMed Central journal article supplement (PMC5629011; doi:10.1371/journal.pntd.0005924), 2017-09-25
Supplement: pntd.0005924.s001.pdf [file pntd.0005924.s001.pdf]

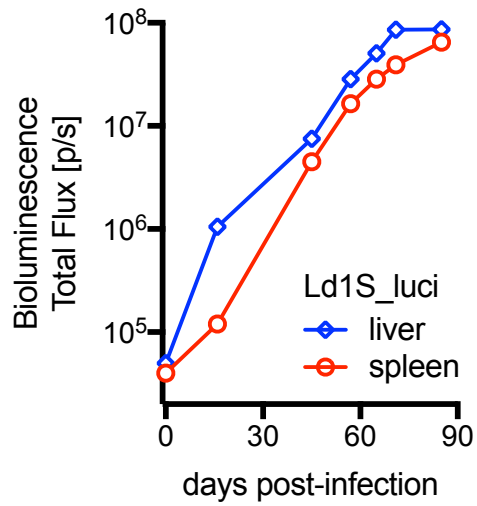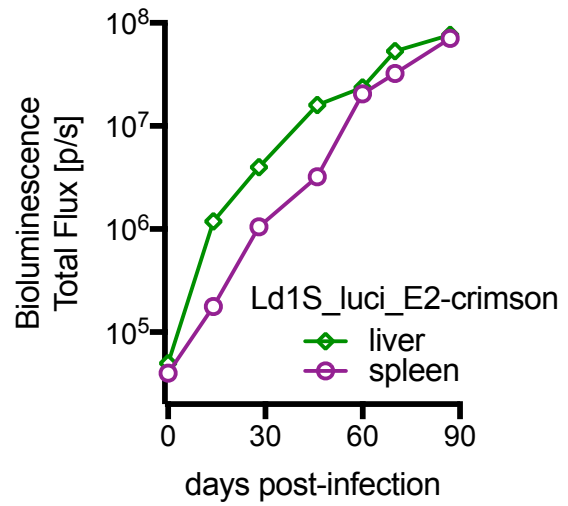

**S1 FIGURE. *In vivo* bioluminescence evaluation in hamsters infected with *Leishmania donovani*.** Hamster infected with Ld1S\_luci (left, as shown in Figure 1A) and hamster infected with Ld1S\_luci\_E2-crimson (right) evidencing similar bioluminescent signals in both livers and spleens.
